# Supplementary material for: The biomolecular characterization of a finger ring contextually dated to the emergence of the Early Neolithic from Syltholm, Denmark
Source: R Soc Open Sci. 2020 Jan 22;7(1):191172. doi: 10.1098/rsos.191172 (PMC7029941; doi:10.1098/rsos.191172)
Supplement: FASTA file of published type 1 collagen sequences from red deer and elk [file rsos191172supp1.fasta]

>Alces_alces
GPMGPSGPRGIPGPPGAPGPQGFQGPPGEPGEPGASGPMGPRGPPGPPGKNGDDGEAGKPGRPGERGPPGPQGARGIPGTAGIPGMKGHRGFSGIDGAKGDAGPAGPKGEPGSPGENGAPGQMGPRGLPGERGRPGAPGPAGARGNDGATGAAGPPGPTGPAGPPGFPGAVGAKGEAGPQGPRGSEGPQGVRGEPGPPGPAGAAGPAGNPGADGQPGAKGANGAPGIAGAPGFPGARGPSGPQGPSGPPGPKGNSGEPGAPGSKGDTGAKGEPGPTGIQGPPGPAGEEGKRGARGEPGPAGIPGPPGERGGPGSRGFPGADGVAGPKGPAGERGSPGPAGPKGSPGEAGRPGEAGIPGAKGITGSPGSPGPDGKTGPPGPAGQDGRPGPPGPPGARGQAGVMGFPGPKGAAGEPGKAGERGVPGPPGAVGPAGKDGEAGAQGPPGPAGPAGERGEQGPAGSPGFQGLPGPAGPPGEAGKPGEQGVPGDIGAPGPSGARGERGFPGERGVQGPPGPAGPRGANGAPGNDGAKGDAGAPGAPGSQGAPGIQGMPGERGAAGIPGPKGDRGDAGPKGADGAPGKDGVRGITGPIGPPGPAGAPGDKGETGPSGPAGPTGARGAPGDRGEPGPPGPAGFAGPPGADGQPGAKGEPGDAGAKGDAGPPGPAGPAGPPGPIGNVGAPGPKGARGSAGPPGATGFPGAAGRVGPPGPSGNAGPPGPPGPAGKEGSKGPRGETGPAGRAGEVGPPGPPGPAGEKGAPGADGPAGAPGTPGPQGIAGQRGVVGIPGQRGERGFPGIPGPSGEPGKQGPSGASGERGPPGPMGPPGIAGPPGESGREGAPGAEGSPGRDGSPGPKGDRGETGPAGPPGAPGAPGAPGPVGPAGKSGDRGETGPAGPAGPIGPVGARGPAGPQGPRGDKGETGEQGDRGIKGHRGFSGIQGPPGPPGSPGEQGPSGASGPAGPRGPPGSAGTPGKDGINGIPGPIGPPGPRGRTGDAGPAGPPGPPGPPGPPGPPSGGYDLSFLPQPPQEKAHPGGRYYRAKQFDXAKGGGPGPGPMGIMGPRGPPGASGAPGPQGFQGPPGEPGEPGQTGPAGARGPPGPPGKAGEDGHPGKPGRPGERGVVGPQGARGFPGTPGIPGFKGIRGHNGIDGIKGQPGAPGVKGEPGAPGENGTPGQTGARGLPGERGRVGAPGPAGARGSDGSVGPVGPAGPIGSAGPPGFPGAPGPKGEIGPVGNPGPAGPAGPRGEVGIPGISGPVGPPGNPGANGIPGAKGAAGIPGVAGAPGIPGPRGIPGPVGAAGATGARGIVGEPGPAGSKGESGNKGEPGAVGQPGPPGPSGEEGKRGSTGEIGPAGPPGPPGIRGNPGSRGIPGADGRAGVMGPAGSRGATGPAGVRGPNGDSGRPGEPGIMGPRGFPGSPGNIGPAGKEGPVGIPGIDGRPGPIGPAGARGEPGNIGFPGPKGPSGDPGKAGEKGHAGIAGARGAPGPDGNNGAQGPPGIQGVQGGKGEQGPAGPPGFQGIPGPAGTAGEAGKPGERGIPGEFGIPGPAGARGERGPPGESGAAGPAGPIGSRGPSGPPGPDGNKGEPGVVGAPGTAGPSGPSGIPGERGAAGIPGGKGEKGETGIRGDIGSPGRDGARGAPGAVGAPGPAGANGDRGEAGPAGPAGPAGPRGSPGERGEVGPAGPNGFAGPAGAAGQAGAKGERGTKGPKGENGPVGPTGPVGAAGPSGPNGPPGPAGSRGDGGPPGATGFPGAAGRTGPPGPSGISGPPGPPGPAGKEGIRGPRGDQGPVGRTGETGASGPPGFAGEKGPSGEPGTAGPPGTPGPQGIIGAPGFIGIPGSRGERGIPGVAGSVGEPGPIGIAGPPGARGPPGNVGNPGVNGAPGEAGRDGNPGNDGPPGRDGQPGHKGERGYPGNAGPVGTAGAPGPQGPVGPTGKHGNRGEPGPAGAVGPAGAVGPRGPSGPQGIRGDKGEPGDKGPRGIPGIKGHNGIQGIPGIAGHHGDQGAPGAVGPAGPRGPAGPSGPAGKDGRTGQPGAVGPAGIRGSQGSQGPAGPPGPPGPPGPPGPS
>Cervus_elaphus
GPMGPSGPRGIPGPPGAPGPQGFQGPPGEPGEPGASGPMGPRGPPGPPGKNGDDGEAGKPGRPGERGPPGPQGARGIPGTAGIPGMKGHRGFSGIDGAKGDAGPAGPKGEPGSPGENGAPGQMGPRGLPGERGRPGAPGPAGARGNDGATGAAGPPGPTGPAGPPGFPGAVGAKGEAGPQGPRGSEGPQGVRGEPGPPGPAGAAGPAGNPGADGQPGAKGANGAPGIAGAPGFPGARGPSGPQGPSGPPGPKGNSGEPGAPGSKGDTGAKGEPGPTGIQGPPGPAGEEGKRGARGEPGPAGIPGPPGERGGPGSRGFPGADGVAGPKGPAGERGSPGPAGPKGSPGEAGRPGEAGIPGAKGITGSPGSPGPDGKTGPPGPAGQDGRPGPPGPPGARGQAGVMGFPGPKGAAGEPGKAGERGVPGPPGAVGPAGKDGEAGAQGPPGPAGPAGERGEQGPAGSPGFQGLPGPAGPPGEAGKPGEQGVPGDIGAPGPSGARGERGFPGERGVQGPPGPAGPRGANGAPGNDGAKGDAGAPGAPGSQGAPGIQGMPGERGAAGIPGPKGDRGDAGPKGADGAPGKDGVRGITGPIGPPGPAGAPGDKGETGPSGPAGPTGARGAPGDRGEPGPPGPAGFAGPPGADGQPGAKGEPGDAGAKGDAGPPGPAGPAGPPGPIGNVGAPGPKGARGSAGPPGATGFPGAAGRVGPPGPSGNAGPPGPPGPAGKEGSKGPRGETGPAGRPGEVGPPGPPGPAGEKGAPGADGPAGAPGTPGPQGIAGQRGVVGIPGQRGERGFPGIPGPSGEPGKQGPSGASGERGPPGPMGPPGIAGPPGESGREGAPGAEGSPGRDGSPGAKGDRGETGPAGPPGAPGAPGAPGPVGPAGKSGDRGETGPAGPAGPIGPVGARGPAGPQGPRGDKGETGEQGDRGIKGHRGFSGIQGPPGPPGSPGEQGPSGASGPAGPRGPPGSAGTPGKDGINGIPGPIGPPGPRGRTGDAGPAGPPGPPGPPGPPGPPSGGYDLSFLPQPPQEKAHPGGRYYRAKQFDXAKGGGPGPGPMGIMGPRGPPGASGAPGPQGFQGPPGEPGEPGQTGPAGARGPPGPPGKAGEDGHPGKPGRPGERGVVGPQGARGFPGTPGIPGFKGIRGHNGIDGIKGQPGAPGVKGEPGAPGENGTPGQTGARGLPGERGRVGAPGPAGARGSDGSVGPVGPAGPIGSAGPPGFPGAPGPKGEIGPVGNPGPAGPAGPRGEVGIPGISGPVGPPGNPGANGIPGAKGAAGIPGVAGAPGIPGPRGIPGPVGAAGATGARGIVGEPGPAGSKGESGNKGEPGAVGQPGPPGPSGEEGKRGSTGEIGPAGPPGPPGIRGNPGSRGIPGADGRAGVMGPAGSRGATGPAGVRGPNGDSGRPGEPGIMGPRGFPGSPGNIGPAGKEGPVGIPGIDGRPGPIGPAGARGEPGNIGFPGPKGPSGDPGKAGEKGHAGIAGARGAPGPDGNNGAQGPPGPQGVQGGKGEQGPAGPPGFQGLPGPAGTAGEAGKPGERGIPGEFGIPGPAGARGERGPPGESGAAGPAGPIGSRGPSGPPGPDGNKGEPGVVGAPGTAGPSGPSGIPGERGAAGIPGGKGEKGETGIRGDIGSPGRDGARGAPGAVGAPGPAGANGDRGEAGPAGPAGPAGPRGSPGERGEVGPAGPNGFAGPAGAAGQAGAKGERGTKGPKGENGPVGPTGPVGAAGPSGPNGPPGPAGSRGDGGPPGATGFPGAAGRTGPPGPSGISGPPGPPGPAGKEGIRGPRGDQGPVGRSGETGASGPPGFAGEKGPSGEPGTAGPPGTPGPQGIIGAPGFIGIPGSRGERGIPGVAGSVGEPGPIGIAGPPGARGPPGNVGNPGVNGAPGEAGRDGNPGNDGPPGRDGQPGHKGERGYPGNAGPVGTAGAPGPQGPVGPTGKHGNRGEPGPAGAVGPAGAVGPRGPSGPQGIRGDKGEPGDKGPRGLPGLKGHNGLQGLPGLAGHHGDQGAPGAVGPAGPRGPAGPSGPAGKDGRTGQPGAVGPAGIRGSQGSQGPAGPPGPPGPPGPPGPX
